# Supplementary material
Source: publisher figshare collection journal article supplement (https://gsajournals.figshare.com/ndownloader/files/15204167)
Supplement: Supplementary file 1 [file 15204167]

**Table S4** Mean predictive ability of genomic selection models using tetraploid dosage (GS-TD models) for organic matter (OM), crude protein (CP), *in vitro* digestibility of organic matter (IVD), leaf dry matter (LDM), regrowth capacity (RC), and percentage of leaf blade (PLB). Lower and upper limits are in parenthesis. GS-TD models with the highest mean predictive ability for each trait are indicated in bold. Molecular data contains 41,424 markers.

| Model | OM | CP | IVD | LDM | RC | PLB |
| --- | --- | --- | --- | --- | --- | --- |
| GBLUP-TD | 0.4170  (0.39; 0.45) | 0.2301  (0.19; 0.27) | 0.2369  (0.19; 0.29) | 0.1786  (0.14; 0.22) | 0.2667  (0.22; 0.30) | **0.1915**  (0.16; 0.23) |
| BRR-TD | 0.4189  (0.39; 0.45) | **0.2341**  (0.21; 0.27) | 0.2367  (0.19; 0.29) | **0.1812**  (0.13; 0.21) | 0.2818  (0.24; 0.33) | 0.1844  (0.15; 0.22) |
| BA-TD | 0.4206  (0.39;0.45) | 0.2322  (0.20; 0.27) | 0.2322  (0.19; 0.29) | 0.1762  (0.13; 0.22) | **0.2889**  (0.24; 0.34) | 0.1737  (0.13; 0.21) |
| BB-TD | **0.4229**  (0.39; 0.45) | 0.2331  (0.20; 0.27) | 0.2348  (0.19; 0.29) | 0.1789  (0.12; 0.21) | 0.2829  (0.24; 0.33) | 0.1829  (0.14; 0.22) |
| BC-TD | 0.4194  (0.39; 0.45) | 0.2337  (0.20; 0.27) | 0.2367  (0.19; 0.29) | 0.1809  (0.12; 0.21) | 0.2793  (0.24; 0.32) | 0.1863  (0.15; 0.22) |
| BL-TD | 0.4173  (0.39;0.45) | 0.2335  (0.20; 0.27) | **0.2377**  (0.20; 0.30) | 0.1610  (0.11; 0.21) | 0.2773  (0.24; 0.32) | 0.1826  (0.14; 0.22) |
| Average | 0.4194 | 0.2328 | 0.2358 | 0.1761 | 0.2795 | 0.1836 |
